# Supplementary material
Source: HighWire-hosted journal article supplement (https://erj.ersjournals.com/content/58/1/2000955)

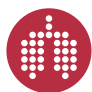

# Increased bactericidal activity but dose-limiting intolerability at 50 mg·kg<sup>-1</sup> rifampicin

SHAREABLE PDF

Lindsey H.M. te Brake<sup>1</sup>, Veronique de Jager<sup>2</sup>, Kim Narunsky<sup>3</sup>, Naadira Vanker<sup>2</sup>, Elin M. Svensson<sup>1,4</sup>, Patrick P.J. Phillips<sup>5</sup>, Stephen H. Gillespie<sup>6</sup>, Norbert Heinrich<sup>7,8</sup>, Michael Hoelscher<sup>7,8</sup>, Rodney Dawson<sup>3</sup>, Andreas H. Diacon<sup>2</sup>, Rob E. Aarnoutse<sup>1</sup> and Martin J. Boeree<sup>9</sup> on behalf of the PanACEA Consortium

<sup>1</sup>Dept of Pharmacy, Radboud Institute for Health Sciences, Radboud University Medical Center, Nijmegen, The Netherlands. <sup>2</sup>TASK Applied Science, Cape Town, South Africa. <sup>3</sup>UCT Lung Institute, Faculty of Health Sciences, University of Cape Town, Cape Town, South Africa. <sup>4</sup>Dept of Pharmaceutical Biosciences, Uppsala University, Uppsala, Sweden. <sup>5</sup>UCSF Center for Tuberculosis, University of California San Francisco, San Francisco, CA, USA. <sup>6</sup>School of Medicine, Medical and Biological Sciences, University of St Andrews, St Andrews, UK. <sup>7</sup>Division of Infectious Diseases and Tropical Medicine, Medical Center of the University of Munich, Munich, Germany. <sup>8</sup>German Center for Infection Research (DZIF), Munich, Germany. <sup>9</sup>Dept of Lung Diseases, Radboud Institute for Health Sciences, Radboud University Medical Center, Nijmegen, The Netherlands.

Corresponding author: Lindsey H.M. te Brake ([lindsey.tebrake@radboudumc.nl](mailto:lindsey.tebrake@radboudumc.nl))

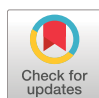

Shareable abstract (@ERSpublications)

While bactericidal activity continues to increase with dose, for the first time we identified dose-limiting intolerability for rifampicin dosed at 50 mg·kg<sup>-1</sup>; 40 mg·kg<sup>-1</sup> seems the optimal tolerable dose for evaluation in TB treatment-shortening trials <https://bit.ly/37dUluB>

Cite this article as: te Brake LHM, de Jager V, Narunsky K, et al. Increased bactericidal activity but dose-limiting intolerability at 50 mg·kg<sup>-1</sup> rifampicin. *Eur Respir J* 2021; 58: 2000955 [DOI: 10.1183/13993003.00955-2020].

This single-page version can be shared freely online.

Copyright ©ERS 2021

This version is distributed under the terms of the Creative Commons Attribution Non-Commercial Licence 4.0. For commercial reproduction rights and permissions contact [permissions@ersnet.org](mailto:permissions@ersnet.org)

This article has supplementary material available from [erj.ersjournals.com](http://erj.ersjournals.com)

Received: 10 April 2020  
Accepted: 7 Dec 2020

## Abstract

**Background** Accumulating data indicate that higher rifampicin doses are more effective and shorten tuberculosis (TB) treatment duration. This study evaluated the safety, tolerability, pharmacokinetics, and 7- and 14-day early bactericidal activity (EBA) of increasing doses of rifampicin. Here we report the results of the final cohorts of PanACEA HIGHRI1, a dose escalation study in treatment-naïve adult smear-positive patients with TB.

**Methods** Patients received, in consecutive cohorts, 40 or 50 mg·kg<sup>-1</sup> rifampicin once daily in monotherapy (day 1–7), supplemented with standard dose isoniazid, pyrazinamide and ethambutol between days 8 and 14.

**Results** In the 40 mg·kg<sup>-1</sup> cohort (n=15), 13 patients experienced a total of 36 adverse events during monotherapy, resulting in one treatment discontinuation. In the 50 mg·kg<sup>-1</sup> cohort (n=17), all patients experienced adverse events during monotherapy, 93 in total; 11 patients withdrew or stopped study medication. Adverse events were mostly mild/moderate and tolerability rather than safety related, i.e. gastrointestinal disorders, pruritis, hyperbilirubinaemia and jaundice. There was a more than proportional increase in the rifampicin geometric mean area under the plasma concentration–time curve from time 0 to 12 h (AUC<sub>0–24 h</sub>) for 50 mg·kg<sup>-1</sup> compared with 40 mg·kg<sup>-1</sup>; 571 (range 320–995) versus 387 (range 201–847) mg·L<sup>-1</sup>·h, while peak exposures saw proportional increases. Protein-unbound exposure after 50 mg·kg<sup>-1</sup> (11% (range 8–17%)) was comparable with lower rifampicin doses. Rifampicin exposures and bilirubin concentrations were correlated (Spearman's  $\rho=0.670$  on day 3,  $p<0.001$ ). EBA increased considerably with dose, with the highest seen after 50 mg·kg<sup>-1</sup>: 14-day EBA  $-0.427$  (95% CI  $-0.500$ – $-0.355$ ) log<sub>10</sub>CFU·mL<sup>-1</sup>·day<sup>-1</sup>.

**Conclusion** Although associated with an increased bactericidal effect, the 50 mg·kg<sup>-1</sup> dose was not well tolerated. Rifampicin at 40 mg·kg<sup>-1</sup> was well tolerated and therefore selected for evaluation in a phase IIc treatment-shortening trial.

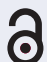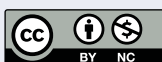

Supplement: inline-supplementary-material-2 [file inline-supplementary-material-2.pdf]
